# Supplementary material for: Exon capture and bulk segregant analysis: rapid discovery of causative mutations using high-throughput sequencing
Source: PubMed Central journal article supplement (PMC3526394; doi:10.1186/1471-2164-13-649), 2012-11-21
Supplement: 1471-2164-13-649-S1.pdf [file 1471-2164-13-649-S1.pdf]

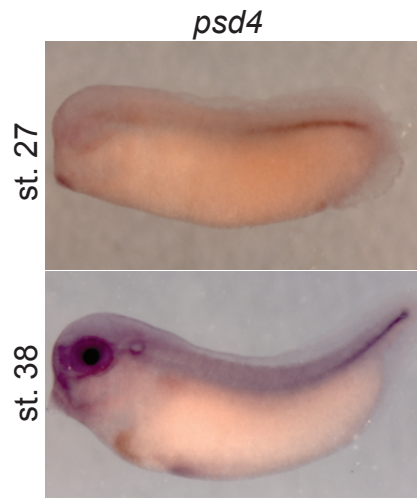

**Supplementary Figure 1:** *psd4* expression by WMISH at stages before pronephros are functional (st. 27) and when they are starting to function (st. 38).

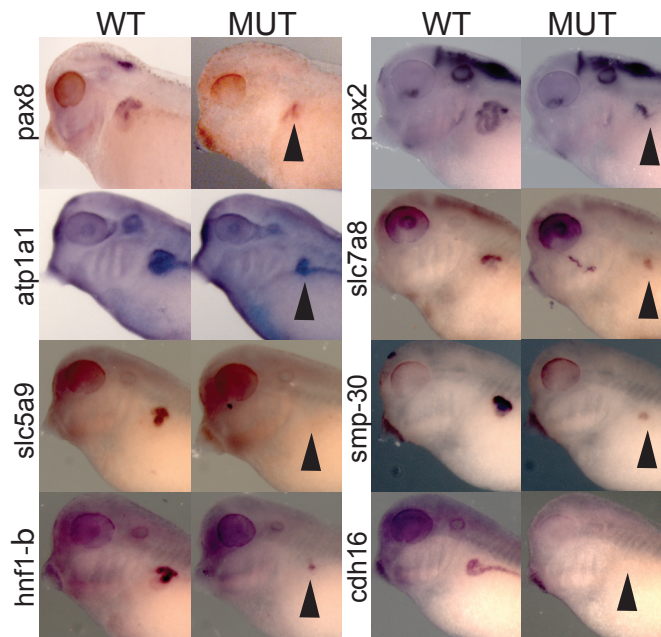

**Supplementary Figure 2:** Expression of pronephric markers in wt and ruby mutant embryos. Embryos from a heterozygous carrier cross were fixed at 36-37 stage and the expression of pronephric markers: *pax8* (paired box 8), *pax2* (paired box 2), *atp1a1* (ATPase, Na<sup>+</sup>/K<sup>+</sup> transporting, alpha 1 polypeptide), *slc7a8* (solute carrier family 7 (amino acid transporter light chain, L system), member 8), *slc5a9* (solute carrier family 5 (sodium/glucose cotransporter), member 9), *smp-30* (senescence marker protein-30), *hnf1-b* (HNF1 homeobox b) and *cdh16* (cadherin 16), were studied by WMISH. Embryos were genotyped to confirm the mutation after imaging. Arrowheads indicate abnormal pronephros.

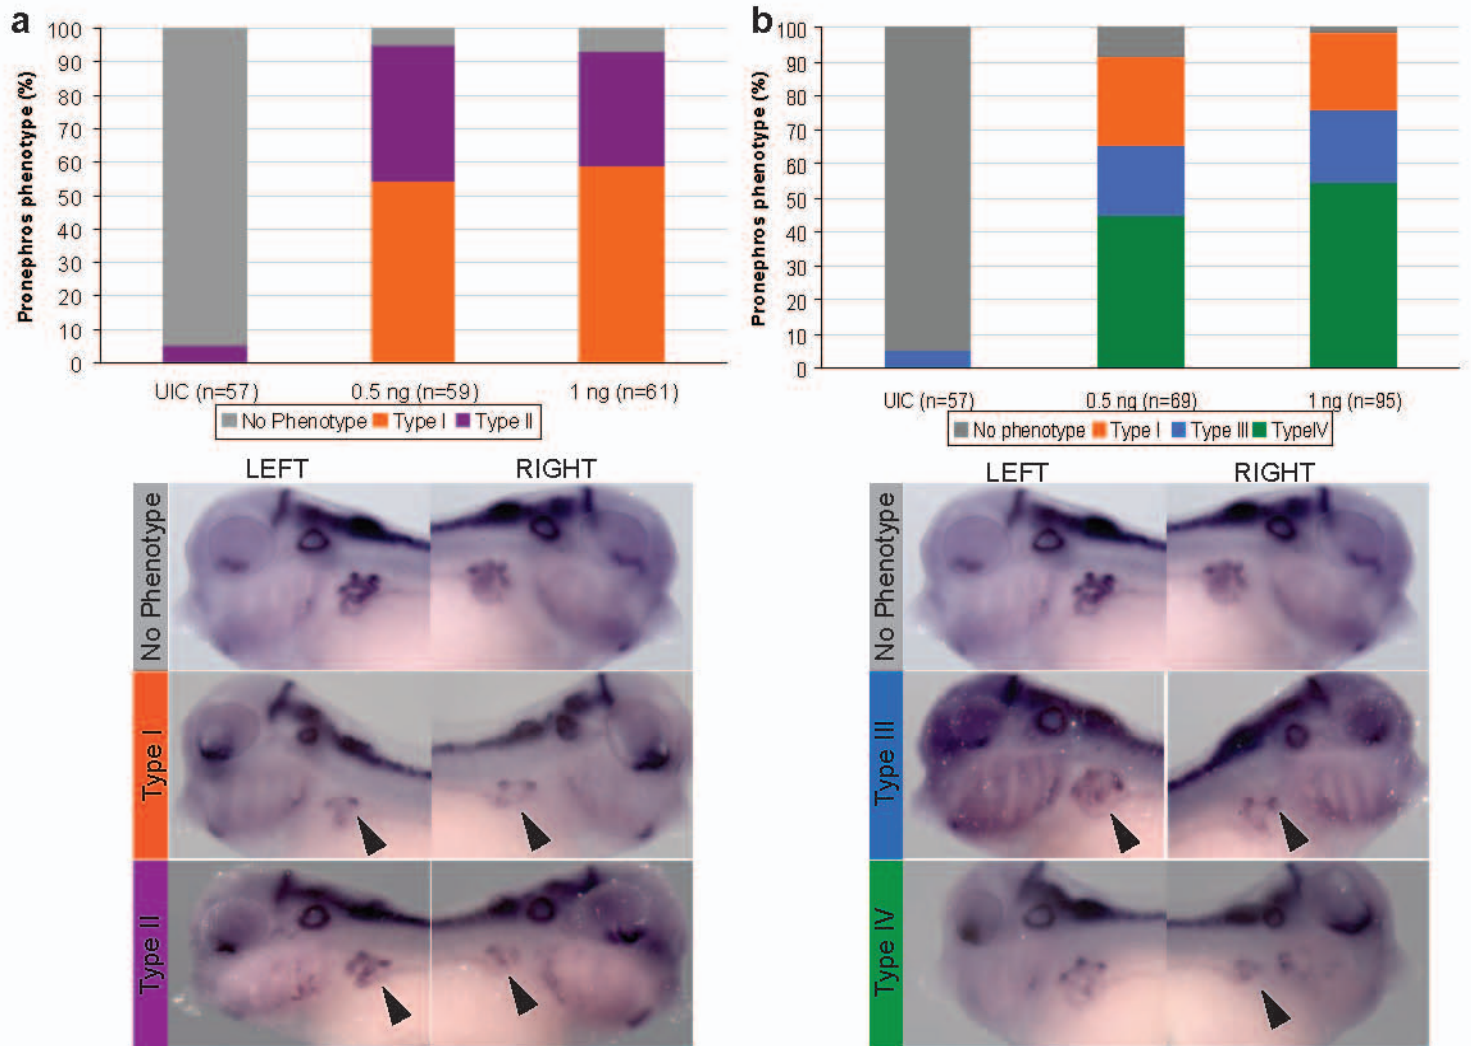

**Supplementary Figure 3:** Phenocopy of *ruby* mutant by *pax8* MO injection. *Pax8* morpholino was injected at one (a) or two cell stage (single cell injected) (b). Embryos were fixed at st 36-37 and pronephric development was assessed by *pax2* expression. Abnormalities in pronephros development were classified: No phenotype; pronephros similar to uninjected controls (UIC); Type I: disrupted and abnormal pronephros similar to *ruby* mutants on both sides of the embryos. Type II: abnormal pronephros on one side and moderate abnormal pronephros on the other side, Type III: disrupted and abnormal pronephros on the injected side and moderate abnormal phenotype on the uninjected side. Type IV: disrupted and abnormal on the injected side and normal pronephros on the uninjected side. Images of *Pax2* WISH showing each type of phenotype are shown. For Type III and IV, embryos shown were injected on the right side. Arrowheads indicate disrupted and abnormal pronephros.

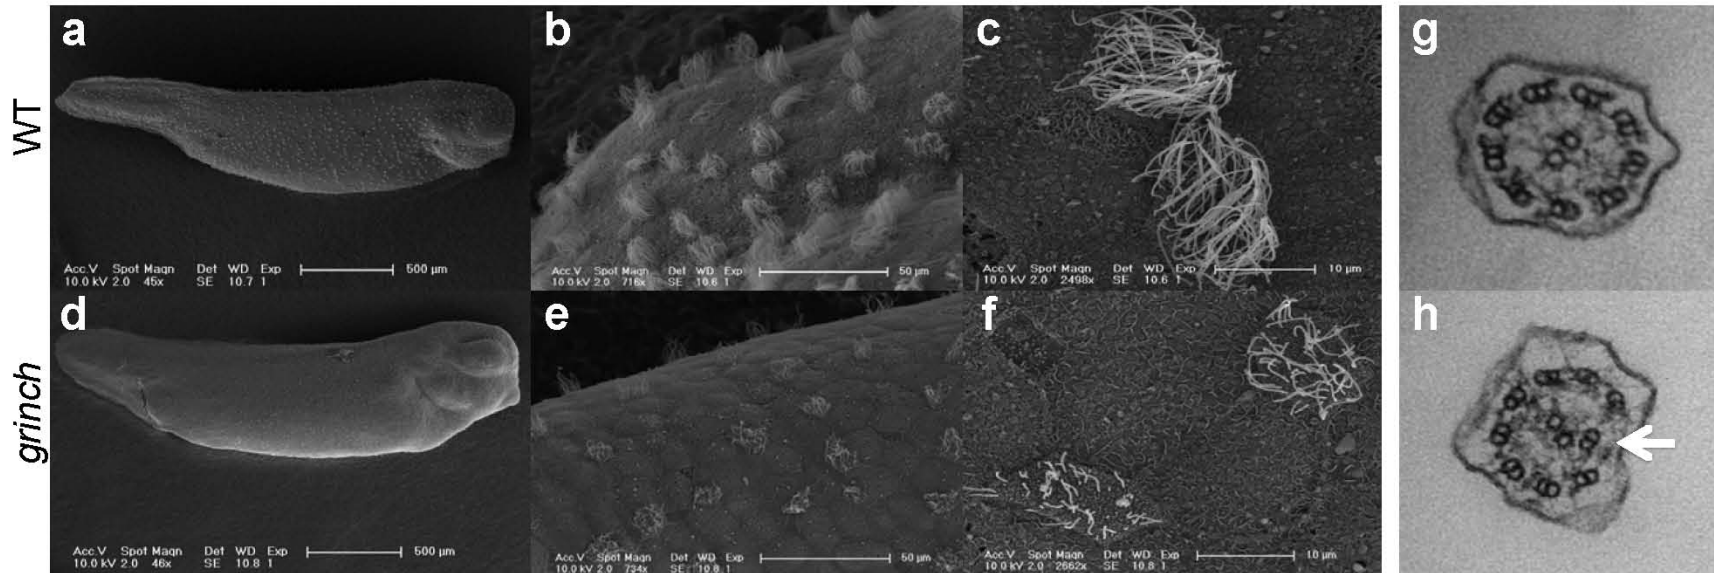

**Supplementary Figure 4:** SEM and TEM of WT and *grinch* embryos. (a-f) SEM; (g,h) TEM; (a-c) WT embryos; (d-f) *grinch* mutant embryos. (f) *grinch* mutants have fewer, shorter and abnormal cilia per cell. (g) WT cilia showing the 9+2 microtubule structure. (h) mutant cilia showing a displaced outer ring microtubule doublet (arrow). Embryos in (a,d) are lateral view with dorsal on top and anterior to the right.



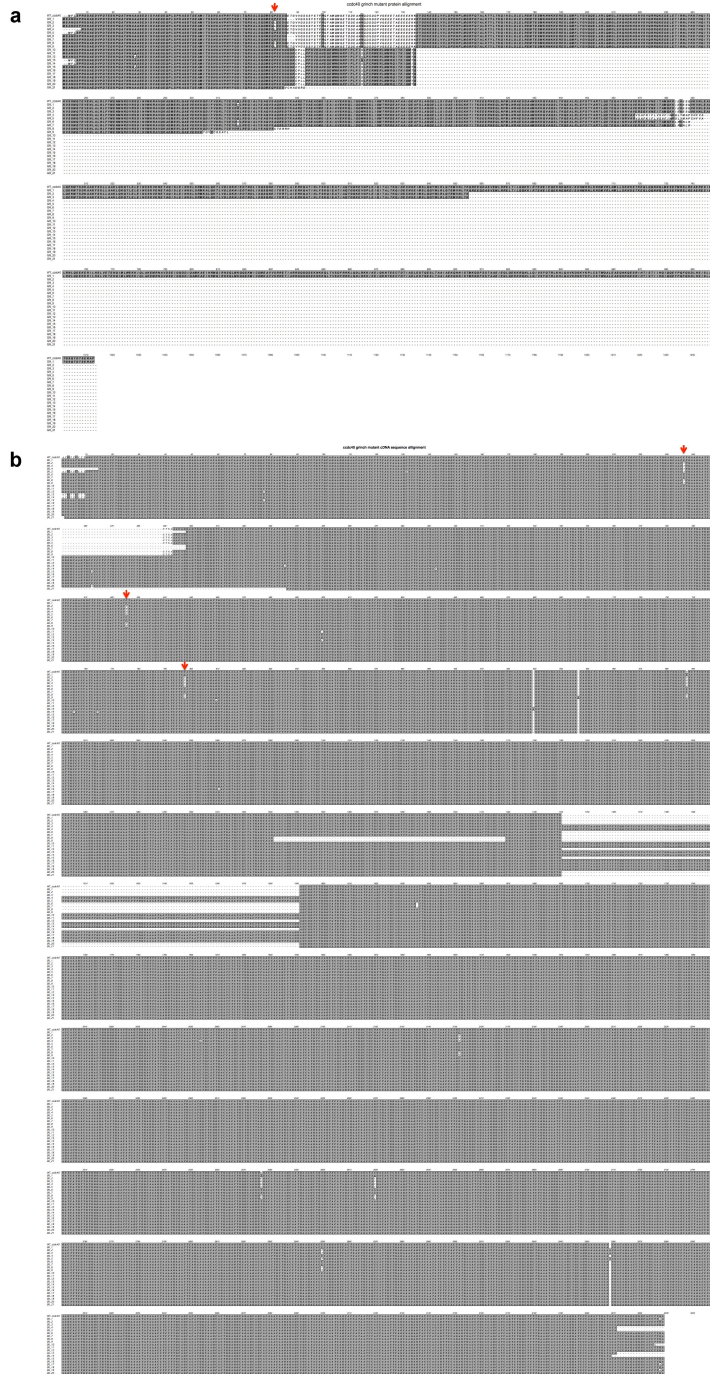**Supplementary Figure 5:**

**(a)** Protein sequence alignment of the 21 *grinch* mutant clones. **(b)** cDNA sequence of the 21 mutant clones. Heterozygosity at the mutant locus (red arrows).



**Supplementary Table 1:** Genotyping primers used for fine mapping in *ruby* and *grinch*.  
n/a: not applicable.

| Mutant        | Marker    | Genotyping Primers                                                      | Enzyme |
|---------------|-----------|-------------------------------------------------------------------------|--------|
| <i>ruby</i>   | 1790      | 5' AATAAAGGTCCTTGCCTTGC 3'<br>5' CAATGTCAAGATGGCTTTGG 3'                | Styl   |
|               | 1211      | 5' CTGAGAGCCAGAATGAGAGG 3'<br>5' ATCATGCCTACACCAAGTGC 3'                | PstI   |
|               | 735       | 5' GCAGTCCTTCGACAATCAGC 3'<br>5' TTTGTATGGGCACTGGAACC 3'                | PvuII  |
|               | 1364      | 5' ATGAGGGAGAAATTCAGAGG 3'<br>5' GGTACTGGTGTGCGAATGG 3'                 | PstI   |
|               | 1571      | 5' CTTACCACAGTTCATCATGG 3'<br>5' CAGGAGACGCAAATAATCTTCC 3'              | PstI   |
|               | 1627      | 5' TCCGGTTCAATCTTCTCTGC 3'<br>5' CTCTAACGTTTCAGGGTTCC 3'                | BamHI  |
|               | 1789      | 5' GAGCCTTCTTAGTGGGATGG 3'<br>5' CAGTGCCATGAACAATCTCC 3'                | PvuII  |
|               | 1791      | 5' TGCTGATTCCCTGCACATAC 3'<br>5' GCAGCTCGAAGTGAAGATCC 3'                | NspI   |
|               | 1862      | 5' GGTGGCCACAAACGTTACC 3'<br>5' CGTTACCTCTGCAATCAAACC 3'                | Styl   |
|               | 2011      | 5' CCCATTCGAGAACTGGAAAA 3'<br>5' GGTTGTATTGGGAGCAATGG 3'                | PsiI   |
|               | 2043      | 5' CCACCCCTTTAAATGGAACC 3'<br>5' TTTGGCTGCCAGATACTCCT 3'                | DraI   |
|               | 2056      | 5' GCAAGCTGGGAAGGATGC 3'<br>5' GTTGAAGTTGATGTTCTGC 3'                   | PstI   |
|               | 2380      | 5' TGTGAAACAGGGAATGTAGG 3'<br>5' GGTAATGCCGAATGTCATGG 3'                | PvuII  |
|               | 6051      | 5' GCAAGCAGGAGCCTATAACG 3'<br>5' ATGACTGGCAAGCTGTTGG 3'                 | BamHI  |
| <i>grinch</i> | 008C01    | 5' AGACCCTGCCAAGAAAAGAC 3'<br>5' AGTCCACTCAGCCCTGTTCC 3'                | n/a    |
|               | 016B06    | 5' AAAGGCAACAATAATGGCAG 3'<br>5' GCCAAGTCAGCATCTAATGG 3'                | n/a    |
|               | 100A10    | 5' ATTCTATCCCCTGATCCACC 3'<br>5' TGCAACTATGGGGCTTATTG 3'                | n/a    |
|               | 148E4     | 5' TCCCAGTCACGACGTATATTGAGGTGCCAGGATGC 3'<br>5' CACAAACAAGGCCGAAACTT 3' | n/a    |
|               | 148M1     | 5' TCCCAGTCACGACGTGCATGGAACAAAACGTTGG 3'<br>5' ACCTTGGGTCAAACATGGA 3'   | n/a    |
|               | s148-783K | 5' CATGTCATATTTGCCGTTGG 3'<br>5' AGCAACATTCAAGGGGTTGG 3'                | SsiI   |
|               | s148-146K | 5' CAGCAAGCTGGTTGTAGTGG 3'<br>5' GCCAGAGCTCTCAAGTAGAGG 3'               | PstI   |
|               | s148-20K  | 5' CTTTTCAACAGCCTCTGATGG 3'<br>5' ATGCCAGAGTCCCATAAAGC 3'               | Avall  |
|               | s304-1.3M | 5' TAGCTGCCCCCTATCACCATC 3'<br>5' TACATGTCCCGGGCTTCTAT 3'               | AlwNI  |
|               | s304-1M   | 5' CAGGGGTTGGACATGTAAGC 3'<br>5' AGGCAGATCCAGAGCTTTCC 3'                | Avall  |
|               | s304-875K | 5' TCCCAGTCACGACGTCTCGAGCAATGAGTGACAGC 3'<br>5' TGGCACCAATAGGATTGACA 3' | n/a    |

|           |                                                                          |     |
|-----------|--------------------------------------------------------------------------|-----|
| s304-219K | 5' TCCCAGTCACGACGTAGAGCTGGCAGATGGCTAGA 3'<br>5' TGTGCCCATTTACCTGTTTG 3'  | n/a |
| 560E1     | 5' TCCCAGTCACGACGTGGCATGGAGATGTTGCTCTT 3'<br>5' ATGGCCCATGACTCTCTGTT 3'  | n/a |
| 560B2     | 5' TCCCAGTCACGACGTCATCCCAGTGCTTTGCTTTA 3'<br>5' GGCACTCACAAGGCTTTTATG 3' | n/a |
| 029C01    | 5' CGAGTTCGGCTATGACAGAC 3'<br>5' ATCCCTTTTGGGTTGGTTAC 3'                 | n/a |
| 045F05    | 5' TGCATTTTGTAAATGGGGTG 3'<br>5' TTTGTCAGGCACAACAAGTC 3'                 | n/a |
| N3_34     | 5' AGGAGATGCAATTTGGTTGG 3'<br>5' AGAGGCACACACAGGAAAGC 3'                 | n/a |
| 044G07    | 5' ACTGTGACCTTCCTACACGC 3'<br>5' ATTATCTTGTTGGGGACACG 3'                 | n/a |
| 006G10    | 5' TGCTTCAGGGGTCTTCATAC 3'<br>5' CGAGATAGCCAGATAGCCAG 3'                 | n/a |

**Supplementary Table 2:** RT-PCR primers used for *grinch* transcript amplification and sequencing.

| Name        | Primer                             |
|-------------|------------------------------------|
| UTR5-1F     | 5' AGCGTCGCTTAGCAACAGTTAT 3'       |
| UTR3-1R     | 5' CCCAGCTACACAGCAGCTTATT 3'       |
| UTR3-2R     | 5' TCAATAGAGATTTACTAGCCAGTG 3'C    |
| UTR3-3R     | 5' CATTTCCTTTGTTTGTGTCAGTGTTTAG 3' |
| RT_full-F   | 5' ATGTTCCCTAGCCCTAGATCTGG 3'      |
| RT_full-R2  | 5' TCAAGGTGCCCTCTCGGATGTA 3'       |
| E2tE3-F     | 5' AACAACTCTTTCACCAAAGC 3'         |
| E3tE4-R     | 5' ATAGGTCTTGAGAGCCGTCTGG 3'       |
| E6tE7-F     | 5' GAGAATATGAATCGGGATGTGC 3'       |
| RT-3F       | 5' TTCAGGAGGCTTTTAGTCTTGC 3'       |
| RT-3R       | 5' CCCTTTGCTTGGTTAGATTCAC 3'       |
| RT-4F       | 5' TACTGGCAATTGAGAGGAAA 3'         |
| RT-4R       | 5' TCACTGACGGTAACTGCTTCT 3'        |
| RT-5F       | 5' TCAGATCATGTTGTGGGAAAAG 3'       |
| (Fl.)-m13-F | 5' TCCCAGTCACGACGT 3'              |
